# Supplementary material
Source: publisher figshare collection journal article supplement (https://gsajournals.figshare.com/ndownloader/files/12404522)
Supplement: Supplementary file 1 [file 12404522]

**Table S2:** Plasmids used in this study.

| **Plasmid** | **Promoter, Gene, Marker** | **Reference** |
| --- | --- | --- |
| pMB1458 | *GAL His(6X)-3HA-CSE4 (2μ, URA3)* | Au *et al.* 2008 |
| pRB467 | *GAL His(6X)-3HA-CSE4 (2μ, TRP1)* | Chen *et al.* 2000 |
| pMB1597 | *GAL 3HA-CSE4 (2μ, URA3)* | Au *et al.* 2008 |
| pMB1459 | *GAL 3HA-cse4Δ129 (2μ, URA3* | Au *et al.* 2008 |
| pMB433 | *GAL Vector* *(2μ, URA3)* | Mumberg *et al.* 1994 |
| pMB1568 | *MoBy Psh1, (2μ ,LEU2)* | This study |
| pMB1551 | *MoBy empty vector (2μ, LEU2)* | This study |
| pMB1059 | Mtw1-GFP (*LEU2)* | Oliver Kerscher |
| pAB157 | *LEU2[HHT1-HHF1]∆16’* | (Bortvin and Winston, 1996) |
| pAB95 | *URA3[HTA1-HTB1]∆16’* | (Bortvin and Winston, 1996) |
